# Supplementary material for: The REGγ-proteasome forms a regulatory circuit with IκBɛ and NFκB in experimental colitis
Source: PubMed Central journal article supplement (PMC4764899; doi:10.1038/ncomms10761), 2016-02-22
Supplement: ncomms10761-s1.pdf [file ncomms10761-s1.pdf]

## Supplementary figures

### Supplementary Figure 1

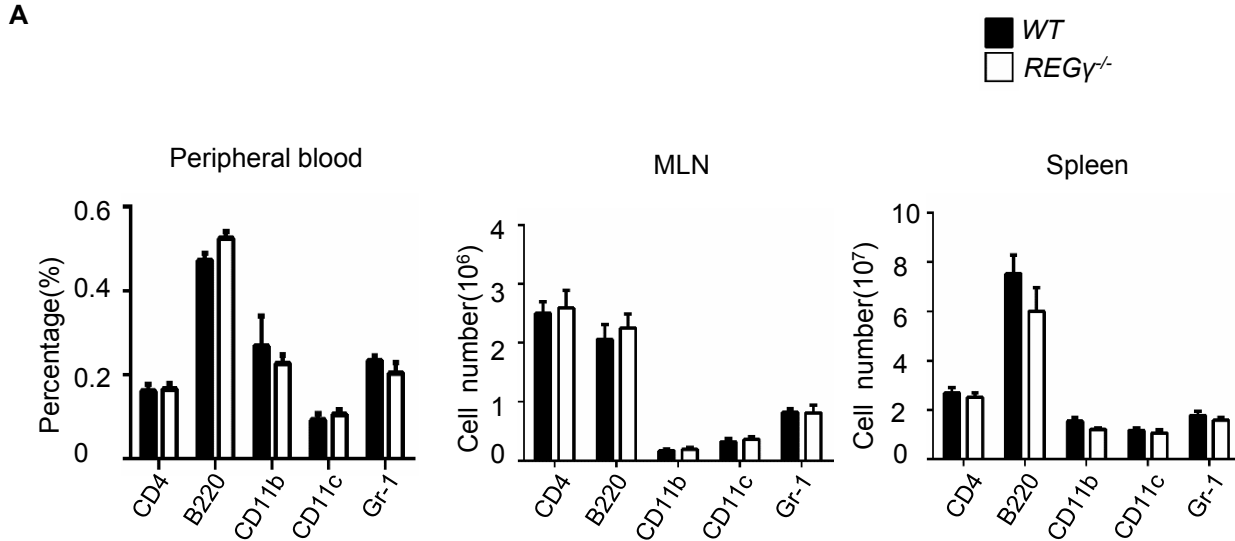

### Supplementary Figure 1

#### No baseline value differences in immune cells from Naïve mice

Peripheral blood, MLN and spleen were collected from Naïve mice. Peripheral blood cells, MLN cells, and splenocytes were analyzed by flow cytometry after staining with antibodies for CD4, B220, CD11b, CD11c, and Gr-1. n=6 per group. Data represent means  $\pm$  SEM(t-test).

**Supplementary Figure 2**

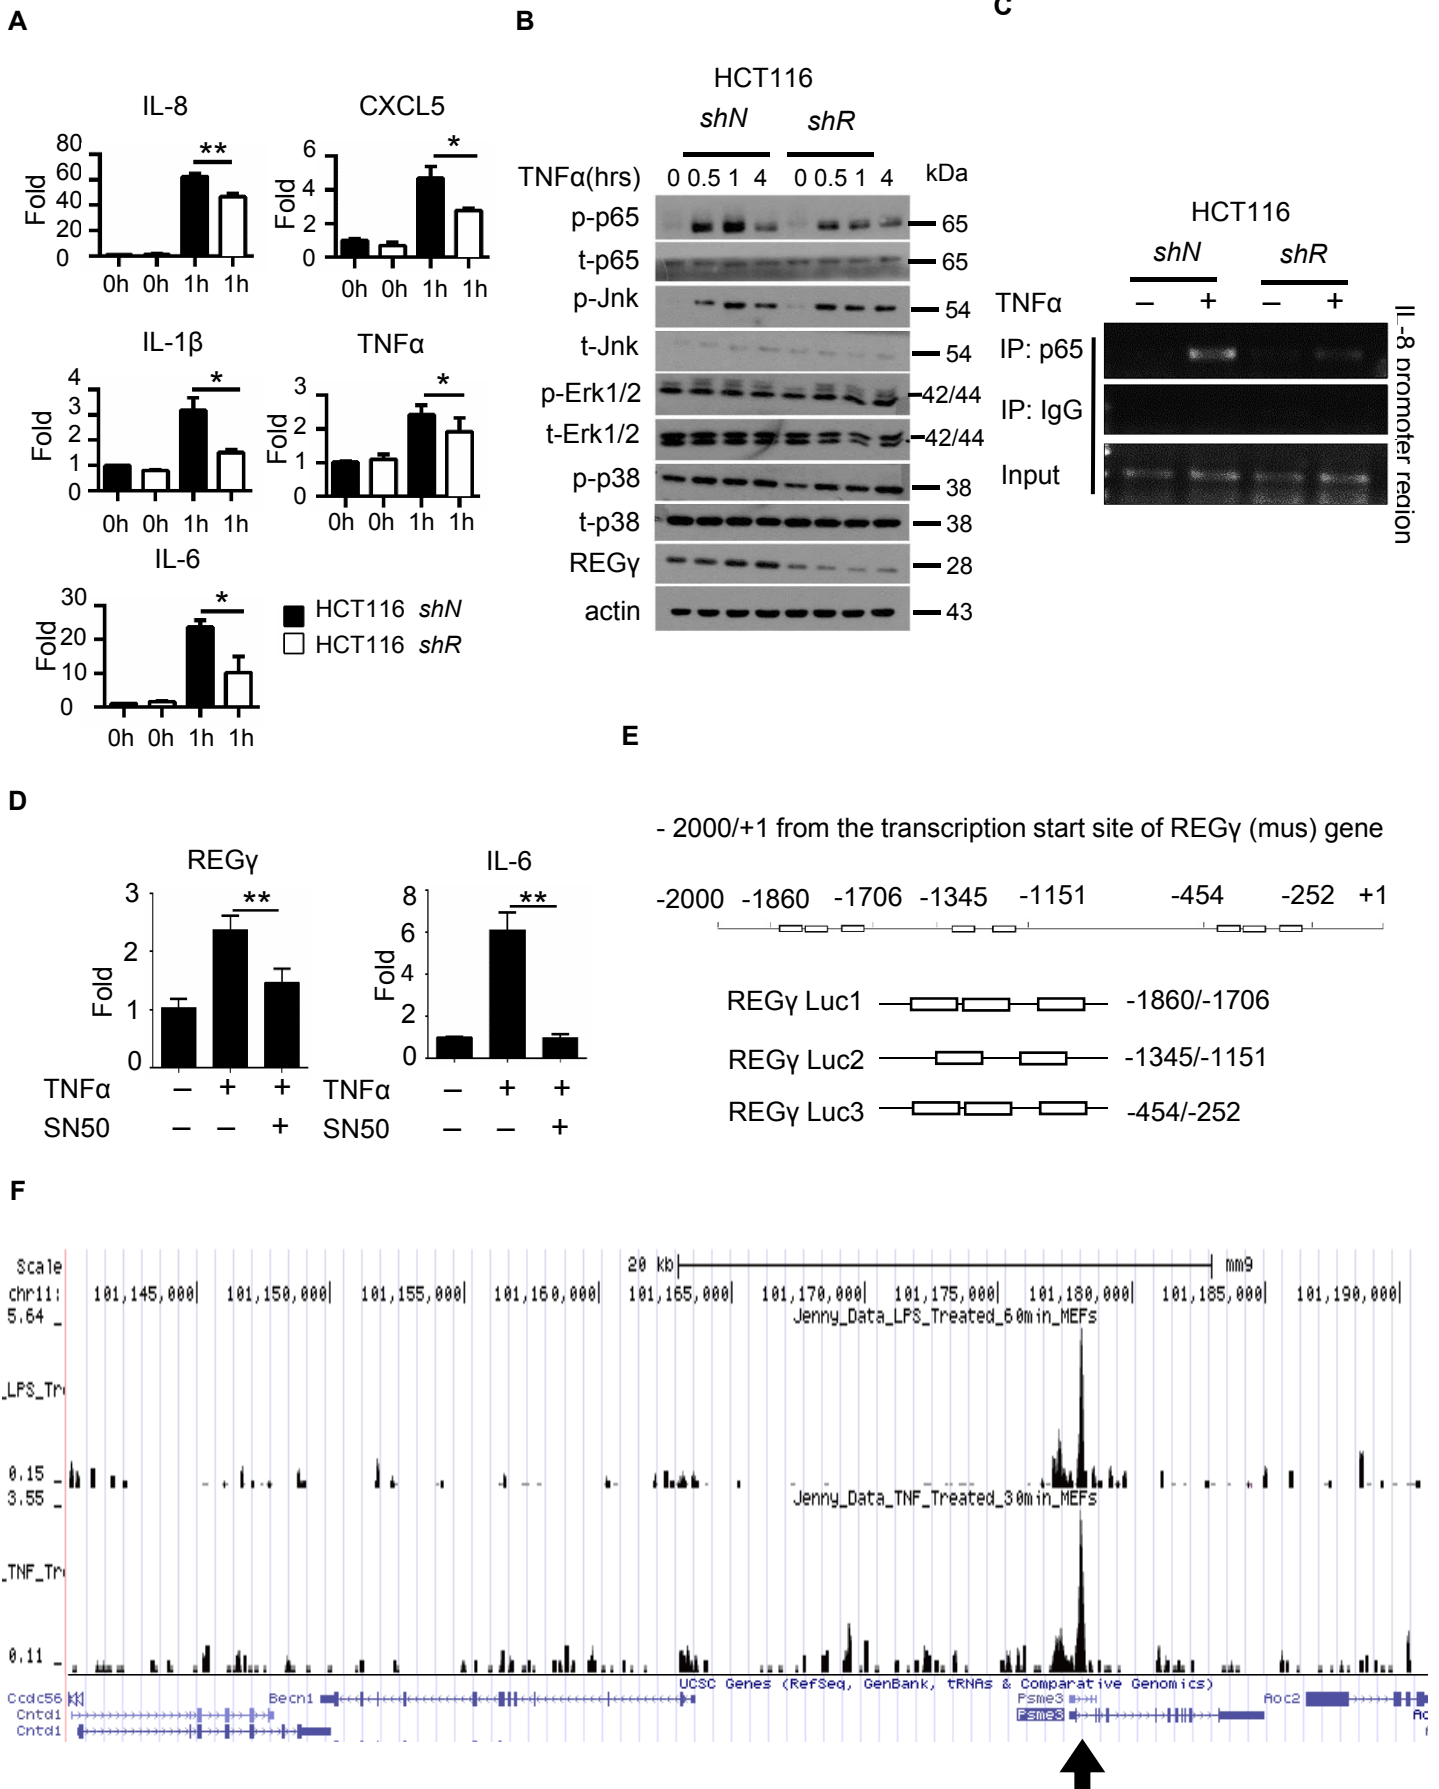

## Supplementary Figure 2

### Mutual regulation between REG $\gamma$ and NF $\kappa$ B.

(A) Total RNA was extracted from colon cancer cell line HCT116 stably knocked down REG $\gamma$  (shR) and control (shN) with or without TNF $\alpha$  stimulation. Expression of NF $\kappa$ B downstream genes were analyzed by RT-PCR.

Data represent means  $\pm$  SEM from three independent experiments; \* $p < 0.05$ ; \*\* $p < 0.01$ (t-test).

(B) Alteration of NF $\kappa$ B and MAPK pathways was estimated in HCT116 shN and shR cells.

(C) ChIP assays of p65 recruitment to IL-8 promoter were performed in HCT116 shN and HCT116 shR cells treated with TNF $\alpha$  for one hour. Chromatin was immunoprecipitated with anti-p65 Ab. Ten percent of the precipitated chromatin (input) was assayed to ensure equal loading.

(D) REG  $\gamma$  transcripts were measured before and after 6h TNF treatment with or without pretreatment of NF $\kappa$ B inhibitor in colon ex vivo culture. n=4, each group, Data represent means  $\pm$  SEM from three independent experiments; \* $p < 0.05$ ; \*\* $p < 0.01$ (t-test).

(E) Potential NF $\kappa$ B binding sequences on REG $\gamma$  promoter was analyzed using TFSEARCH software (<http://www.cbrc.jp/research/db/TFSEARCH.html>) .

(F) ChIP-seq analysis for NF $\kappa$ B/p65 in primary MEFs treated with LPS for 1 hr or TNF for 30 min.

We note a strong peak over the promoter-proximal region of the PSME3/REG $\gamma$  gene but not neighboring genes.

### Supplementary Figure 3

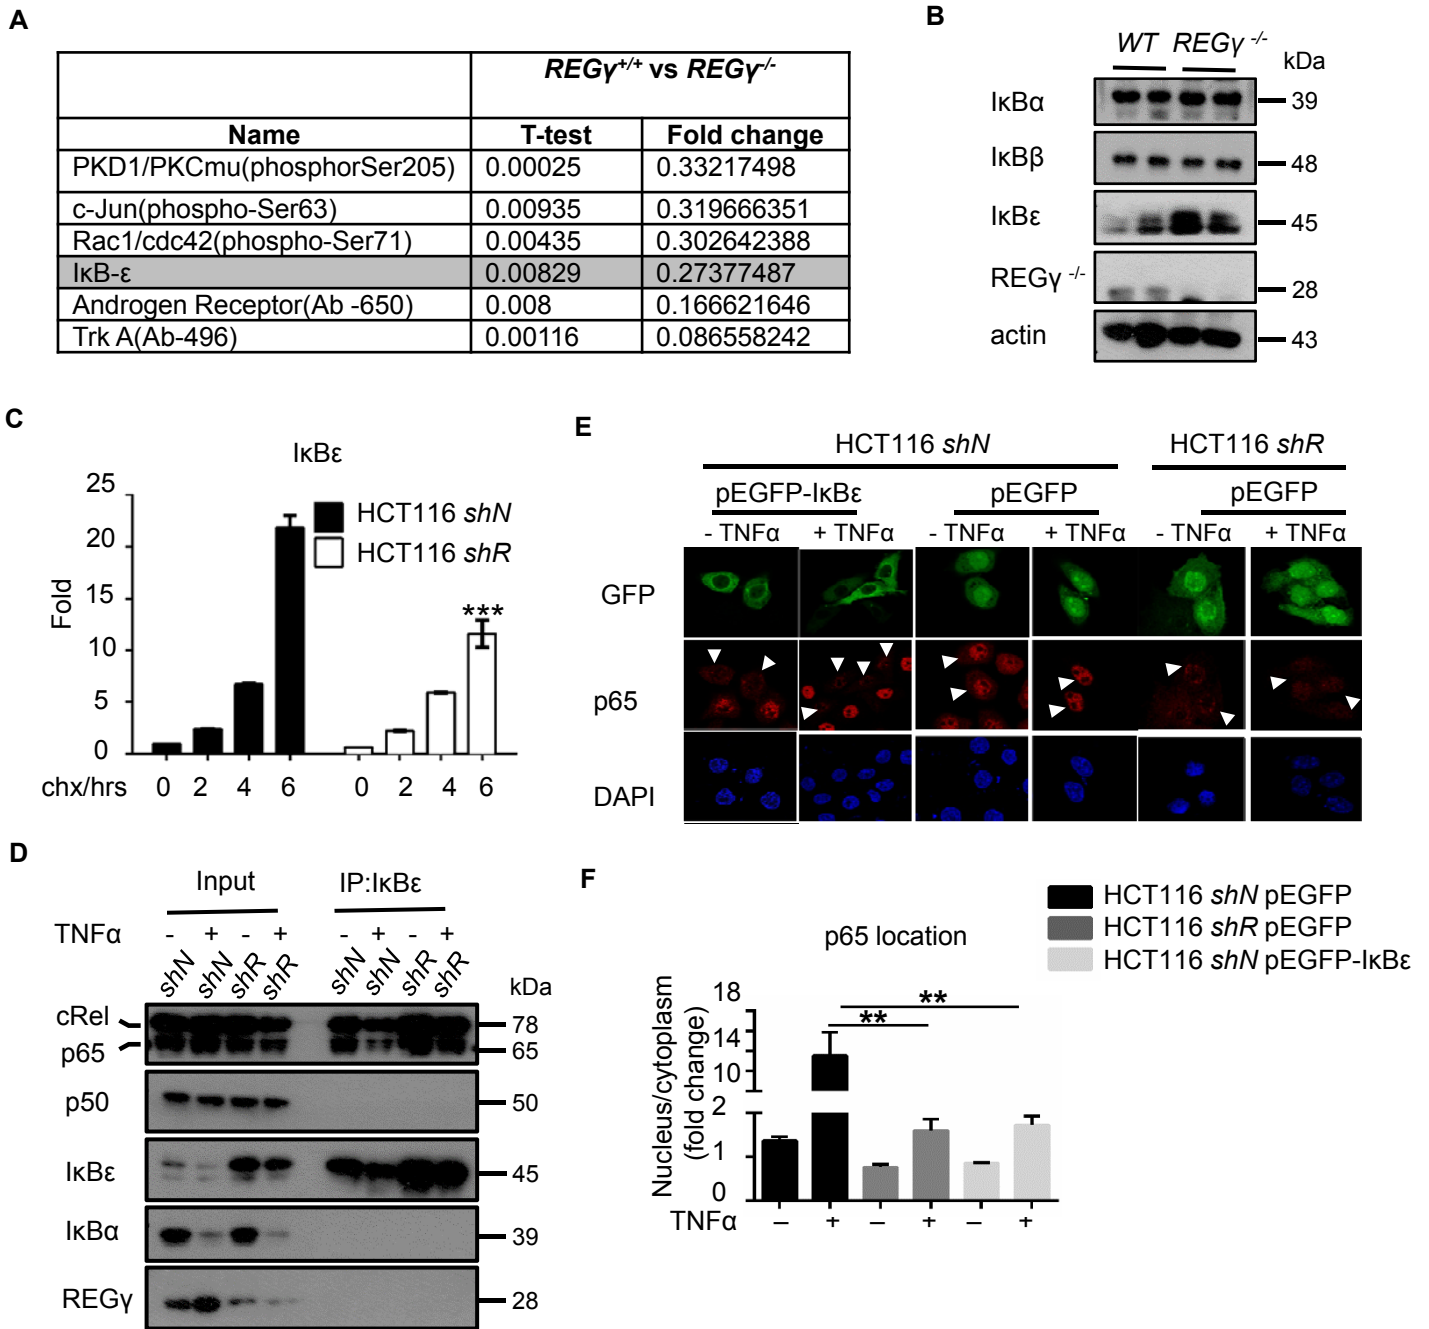

### Supplementary Figure 3 REGγ modulating NFκB signaling via regulation of IκBε

(A) High-throughput proteomic screen of antibody arrays (FullMoon Biosystems) revealed differential expression of IκBε in *REGγ<sup>+/+</sup>* and *REGγ<sup>-/-</sup>* MEF cell. (B) Expression of IκBs in colon epithelial cells isolated from *WT* and *REGγ<sup>-/-</sup>* mice following 7 days of DSS treatment. Representative of three successful times. n=7, each group. (C) IκBε mRNA levels were measured in HCT116 *shN* and *shR* cell following CHX treatment. Data represent means  $\pm$  SEM from three independent experiments; \*\*\*p < 0.001(t-test). (D) IκBε protein complexes. HCT116 *shN* and *shR* cell were stimulated with/without TNFα and immunoprecipitated (IP) with IκBε antibody followed by Western blot as indicated. P65 and c-Rel, but not p50, could be immunoprecipitated by IκBε. Moreover, elevated IκBε in *shR* cell contributed to more stable IκBε/p65/c-Rel complex that are resistant to TNFα stimulated degradation. Representative of three experiments. (E and F) HCT116 *shN/shR* cells transfected with a control vector (pEGFP) or IκBε (pEGFP-IκBε) were stimulated with or without TNFα for 1 hour. Cell were then fixed and labeled for GFP and p65. Quantitative assessment of relative p65 distribution (nucleus/cytoplasm) reflects relative NFκB activities in 3 independent experiments. Data represent means  $\pm$  SEM, \*\*p < 0.001(t-test).

**Supplementary Figure 4**

**A**

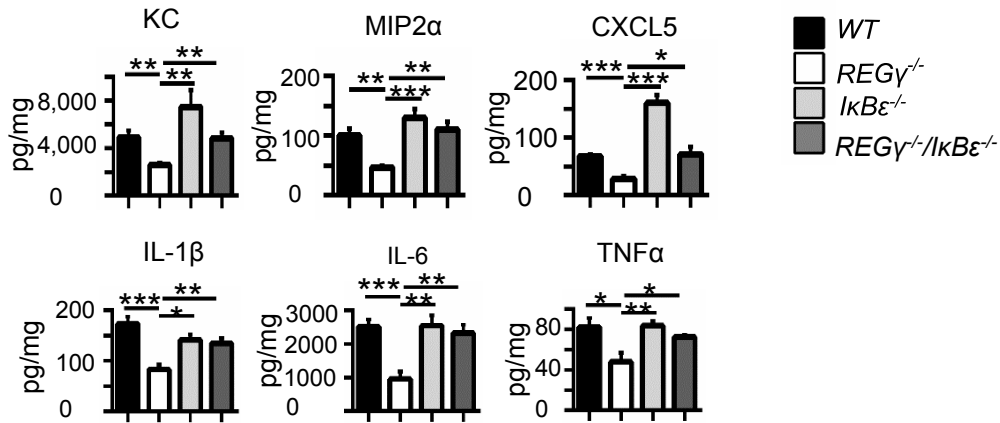

**B**

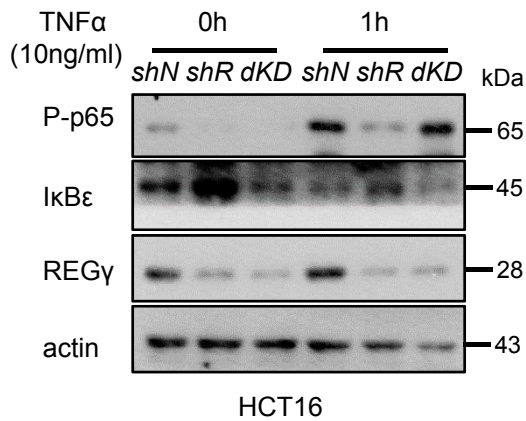

**C**

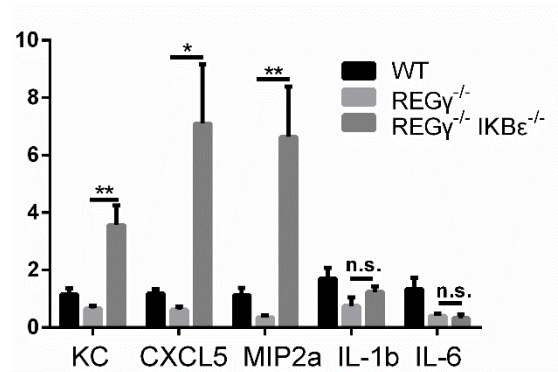

**Supplementary Figure 4**

**IκBε significantly contributes to REGγ-dependent regulation of NFκB responsive genes**

(A) Colon levels of cytokines were assessed from supernatants of organ culture by ELISA. n=5,each group.

Data represent means ± SEM. \*p < 0.05; \*\*p < 0.01, \*\*\*p < 0.001(t-test).

(B) Compound depletion of IκBε and REGγ restores NFκB activity in HCT116 *dKD* (*REGγ* and *IκBε* stable knock-down) cells. Representative of two experiments.

(C) Colon epithelial cells from *WT*, *REGγ*<sup>-/-</sup> and *REGγ*<sup>-/-</sup>/*IκBε*<sup>-/-</sup> mice were isolated at experimental day 7, total RNA was extracted for analysis of NFκB regulated down-stream genes by real- time RT-PCR; n= 5,each group . Data represent means ± SEM. \*p < 0.05; \*\*p < 0.01; n.s.=no significance (t-test).

**Supplementary Figure 5**

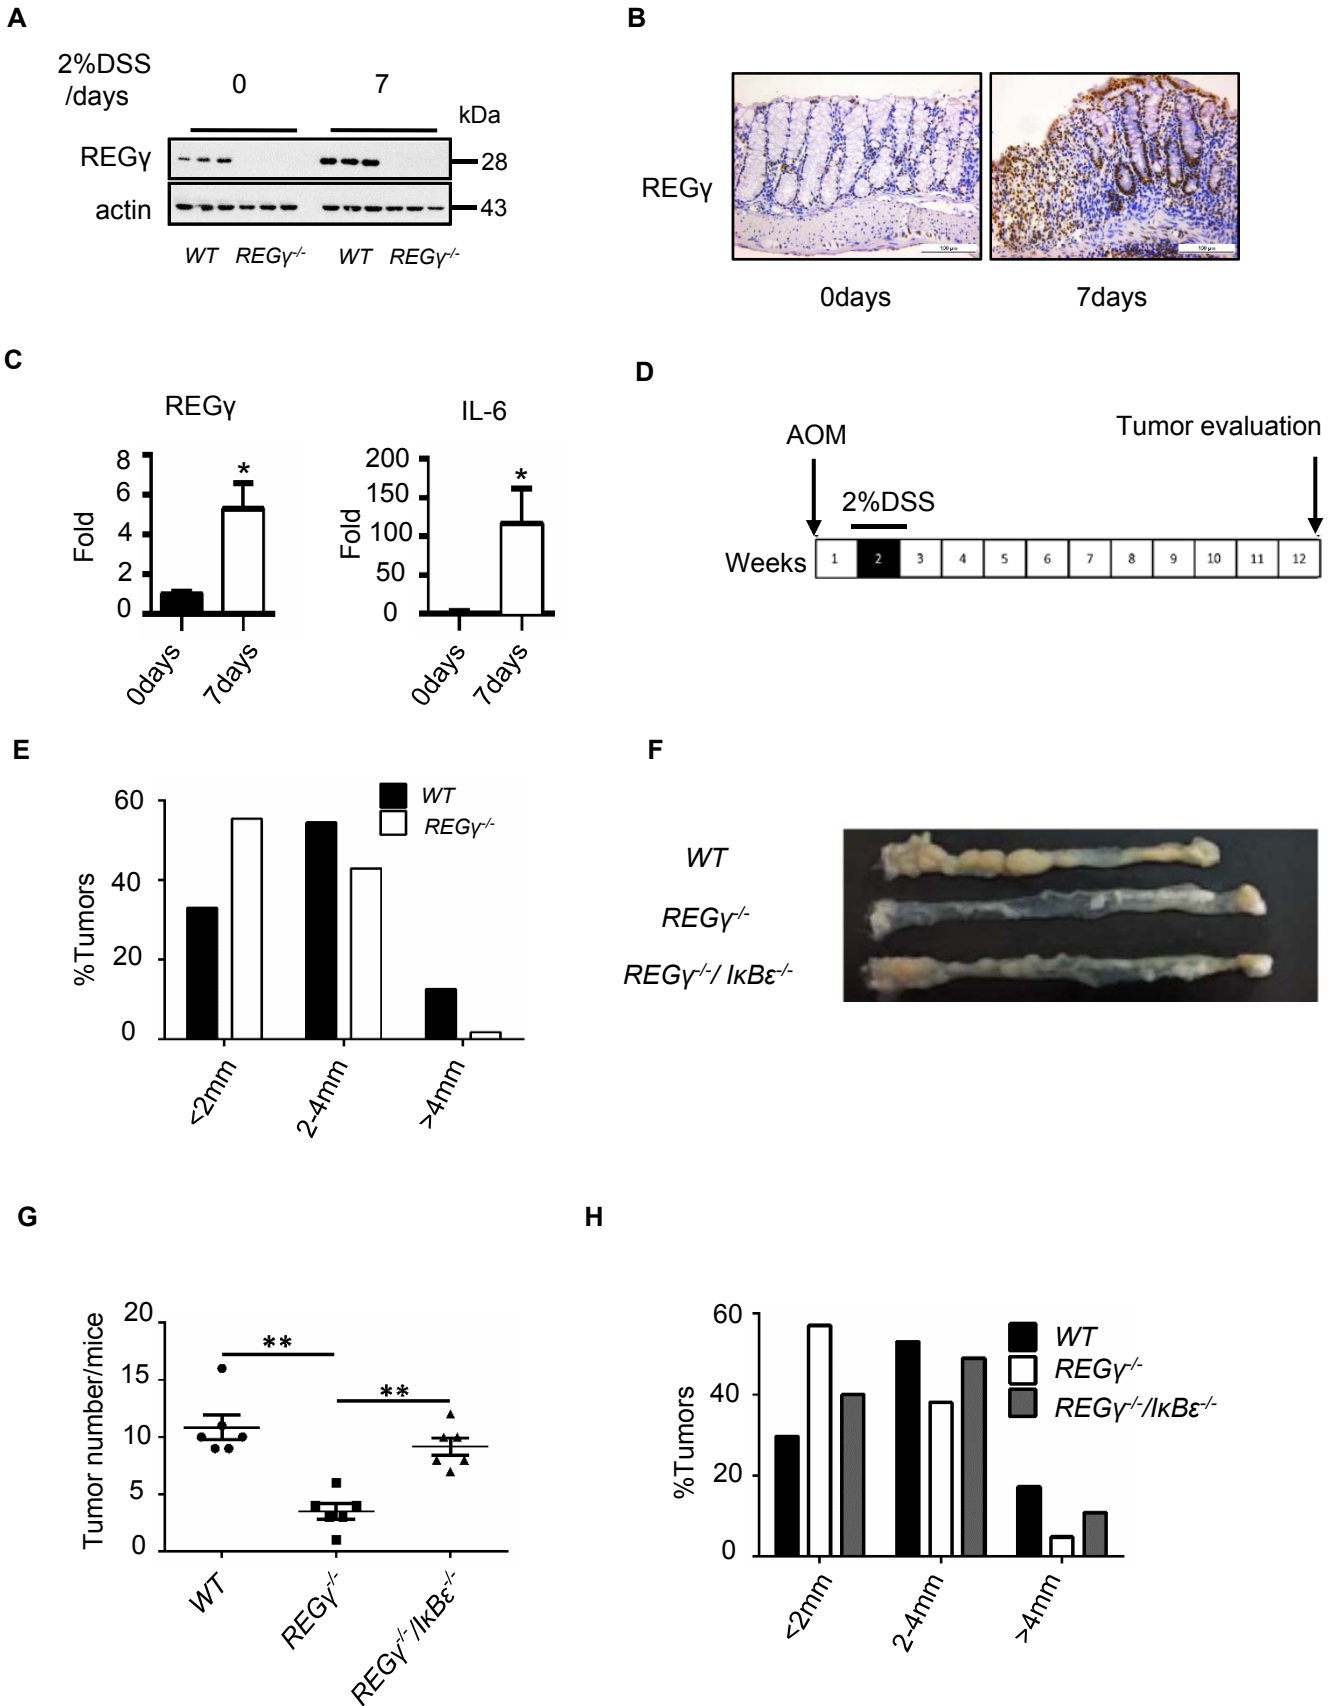

## Supplementary Figure 5

### Elevated REGγ expression in colitis is associated with colon tumorigenesis in an IκBε dependent manner

(A) REGγ protein level was measured in colon epithelial cells from day 0 or 7 days DSS treated mice by Western blot.

(B) Analysis of REGγ protein level in paraffin-embedded colon sections of control (day 0) or 7 days DSS treated mice by immunohistochemistry. Representative images were shown, and the experiment was successfully repeated four times. Scale bars represent 100 μM.

(C) Expression of REGγ and inflammatory cytokine IL6 were elevated in colon epithelial cells collected from DSS treated mice, n=6, each group. Data shown are representative of three independent experiments and denotes means ± SEM. \*p < 0.05.

(D) Schematic diagram of the experimental design for colitis-associated tumorigenesis. Mice were injected with AOM followed by one round of 2% DSS treatment for 7 days.

(E) Diameter of the tumors in *WT* and *REGγ*<sup>-/-</sup> mice was measured. n =8, each group .

(F) Representative appearances of colon tumors developed in *WT*, *REGγ*<sup>-/-</sup>, and *REGγ/IκBε* double knockout mice after AOM and DSS induction. n =8, each group .

(G) The number of colon tumors in *WT*, *REGγ*<sup>-/-</sup>, and *REGγ/IκBε* double knockout mice was counted after AOM and DSS induction. n= 11, *WT* group; n=10, *REGγ*<sup>-/-</sup> group; n=9, *REGγ/IκBε* double knockout group. \*\*p < 0.01.

(H) Summary of the tumor size in mice with different genotypes.

## Supplementary Figure 6

**A**

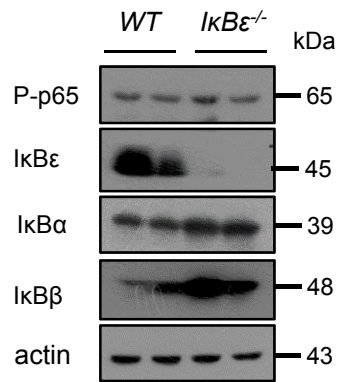

**B**

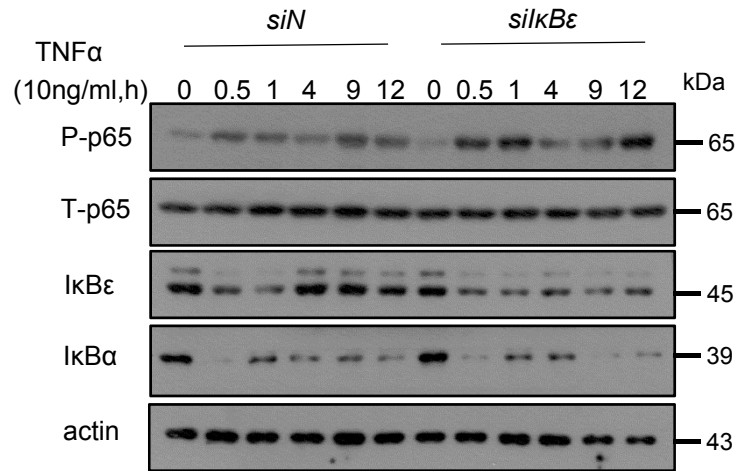

## Supplementary Figure 6

### Compensational upregulation of other IκBs in *IkBε<sup>-/-</sup>* colon epithelial cells.

(A) Expression of IκBα/β and p-p65 in colon epithelial cells isolated from *WT* and *REGγ<sup>-/-</sup>* mice following 7 days of DSS treatment. Each lane represents a sample from an individual mouse. Representative data were from three experiments.

(B) Silenced IκBε with transient siRNA in HCT116 cell to detect p-p65 and IκBα.



Supplementary Figure 7

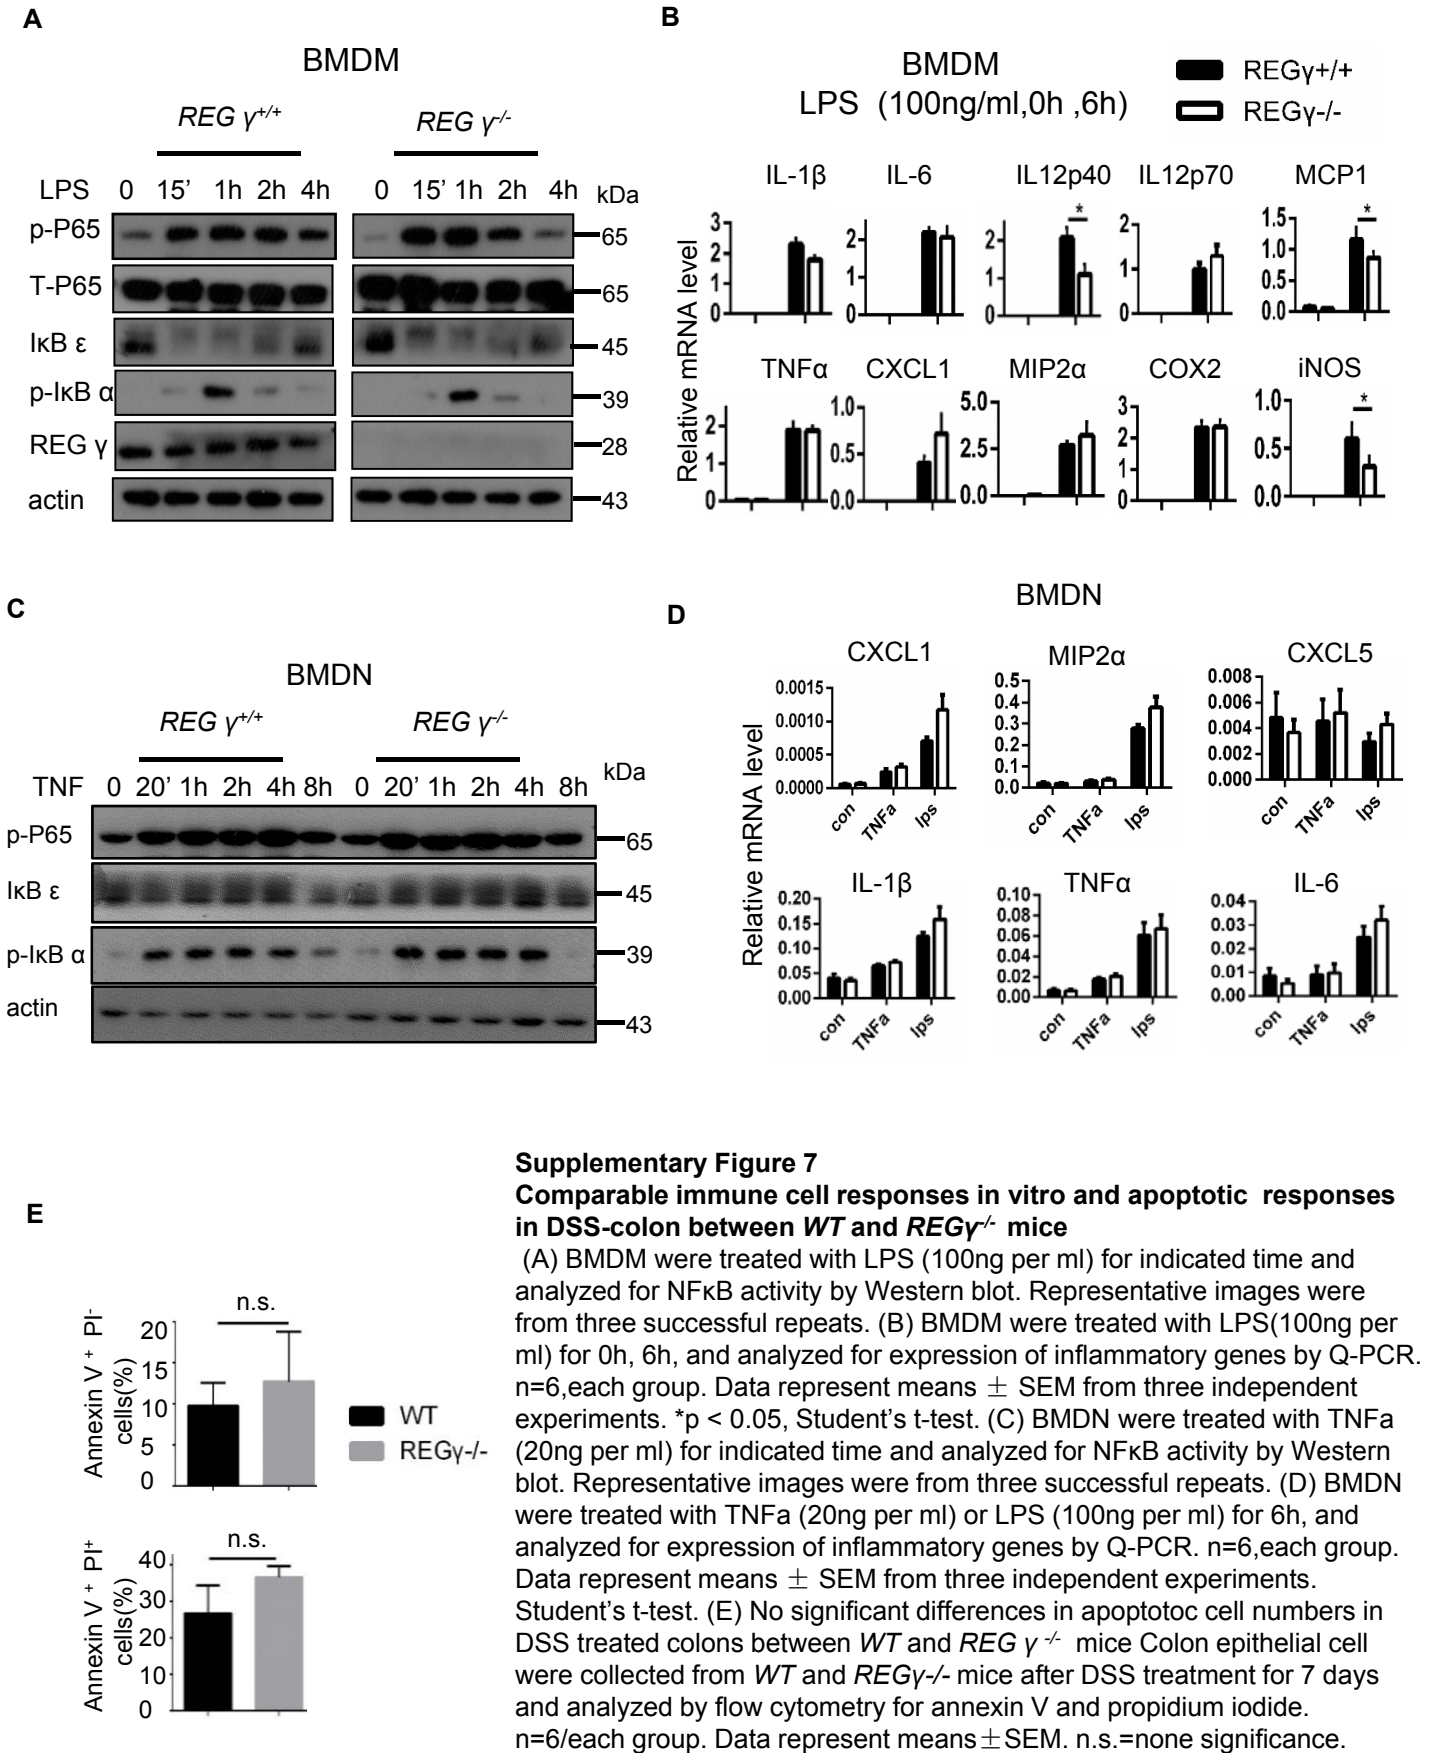

Supplementary Figure 7

Comparable immune cell responses in vitro and apoptotic responses in DSS-colon between WT and *REG*<sup>γ-/-</sup> mice

(A) BMDM were treated with LPS (100ng per ml) for indicated time and analyzed for NFκB activity by Western blot. Representative images were from three successful repeats. (B) BMDM were treated with LPS(100ng per ml) for 0h, 6h, and analyzed for expression of inflammatory genes by Q-PCR. n=6,each group. Data represent means ± SEM from three independent experiments. \*p < 0.05, Student's t-test. (C) BMDN were treated with TNFα (20ng per ml) for indicated time and analyzed for NFκB activity by Western blot. Representative images were from three successful repeats. (D) BMDN were treated with TNFα (20ng per ml) or LPS (100ng per ml) for 6h, and analyzed for expression of inflammatory genes by Q-PCR. n=6,each group. Data represent means ± SEM from three independent experiments. Student's t-test. (E) No significant differences in apoptotic cell numbers in DSS treated colons between WT and *REG*<sup>γ-/-</sup> mice Colon epithelial cell were collected from WT and *REG*<sup>γ-/-</sup> mice after DSS treatment for 7 days and analyzed by flow cytometry for annexin V and propidium iodide. n=6/each group. Data represent means ± SEM. n.s.=none significance.

**Supplementary Figure 8**

**Uncropped gel images for Figure 4**

Figure 4 A

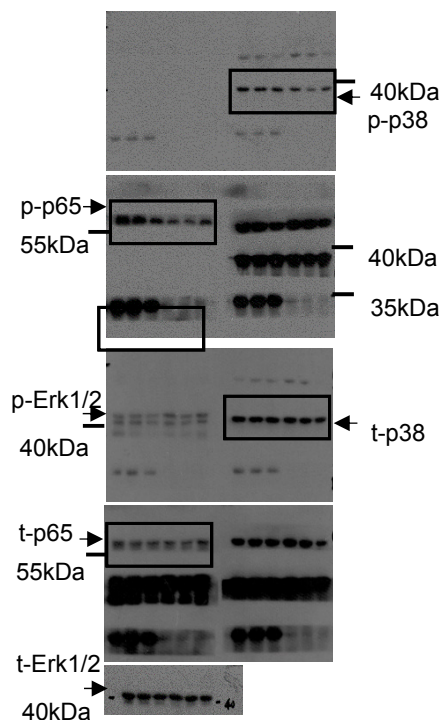

Figure 4 B

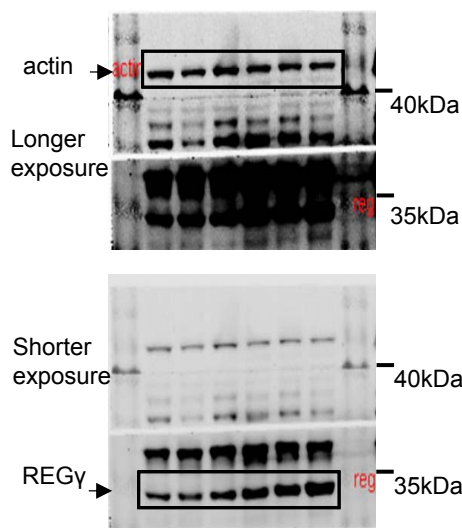

Figure 4 C

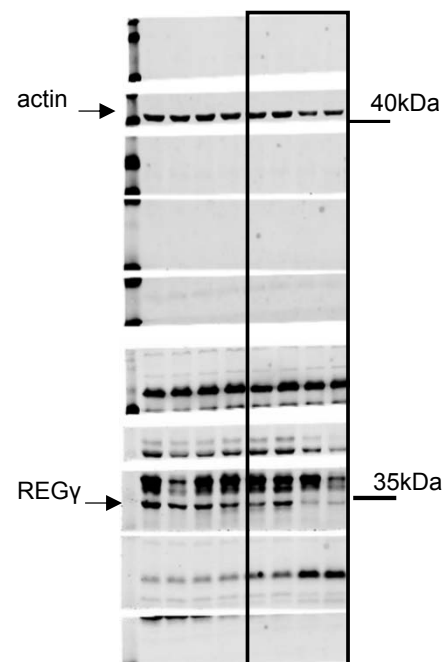

Figure 4 E

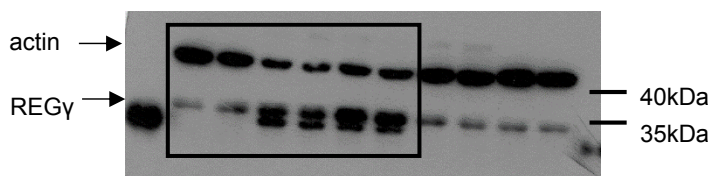

Figure 4 F

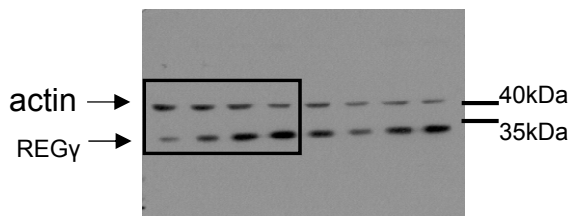

Figure 4 I

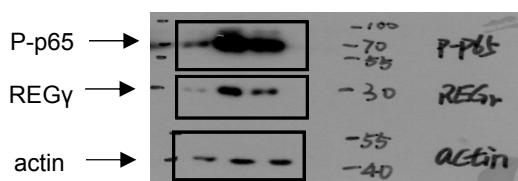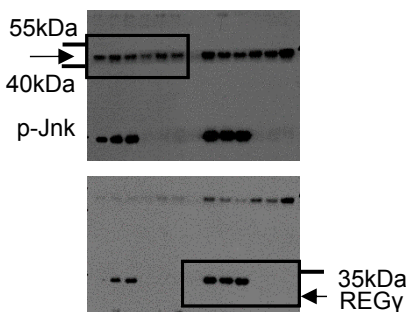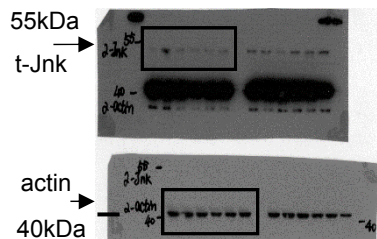

Supplementary Figure 9

Uncropped gel images for Figure 5A-G

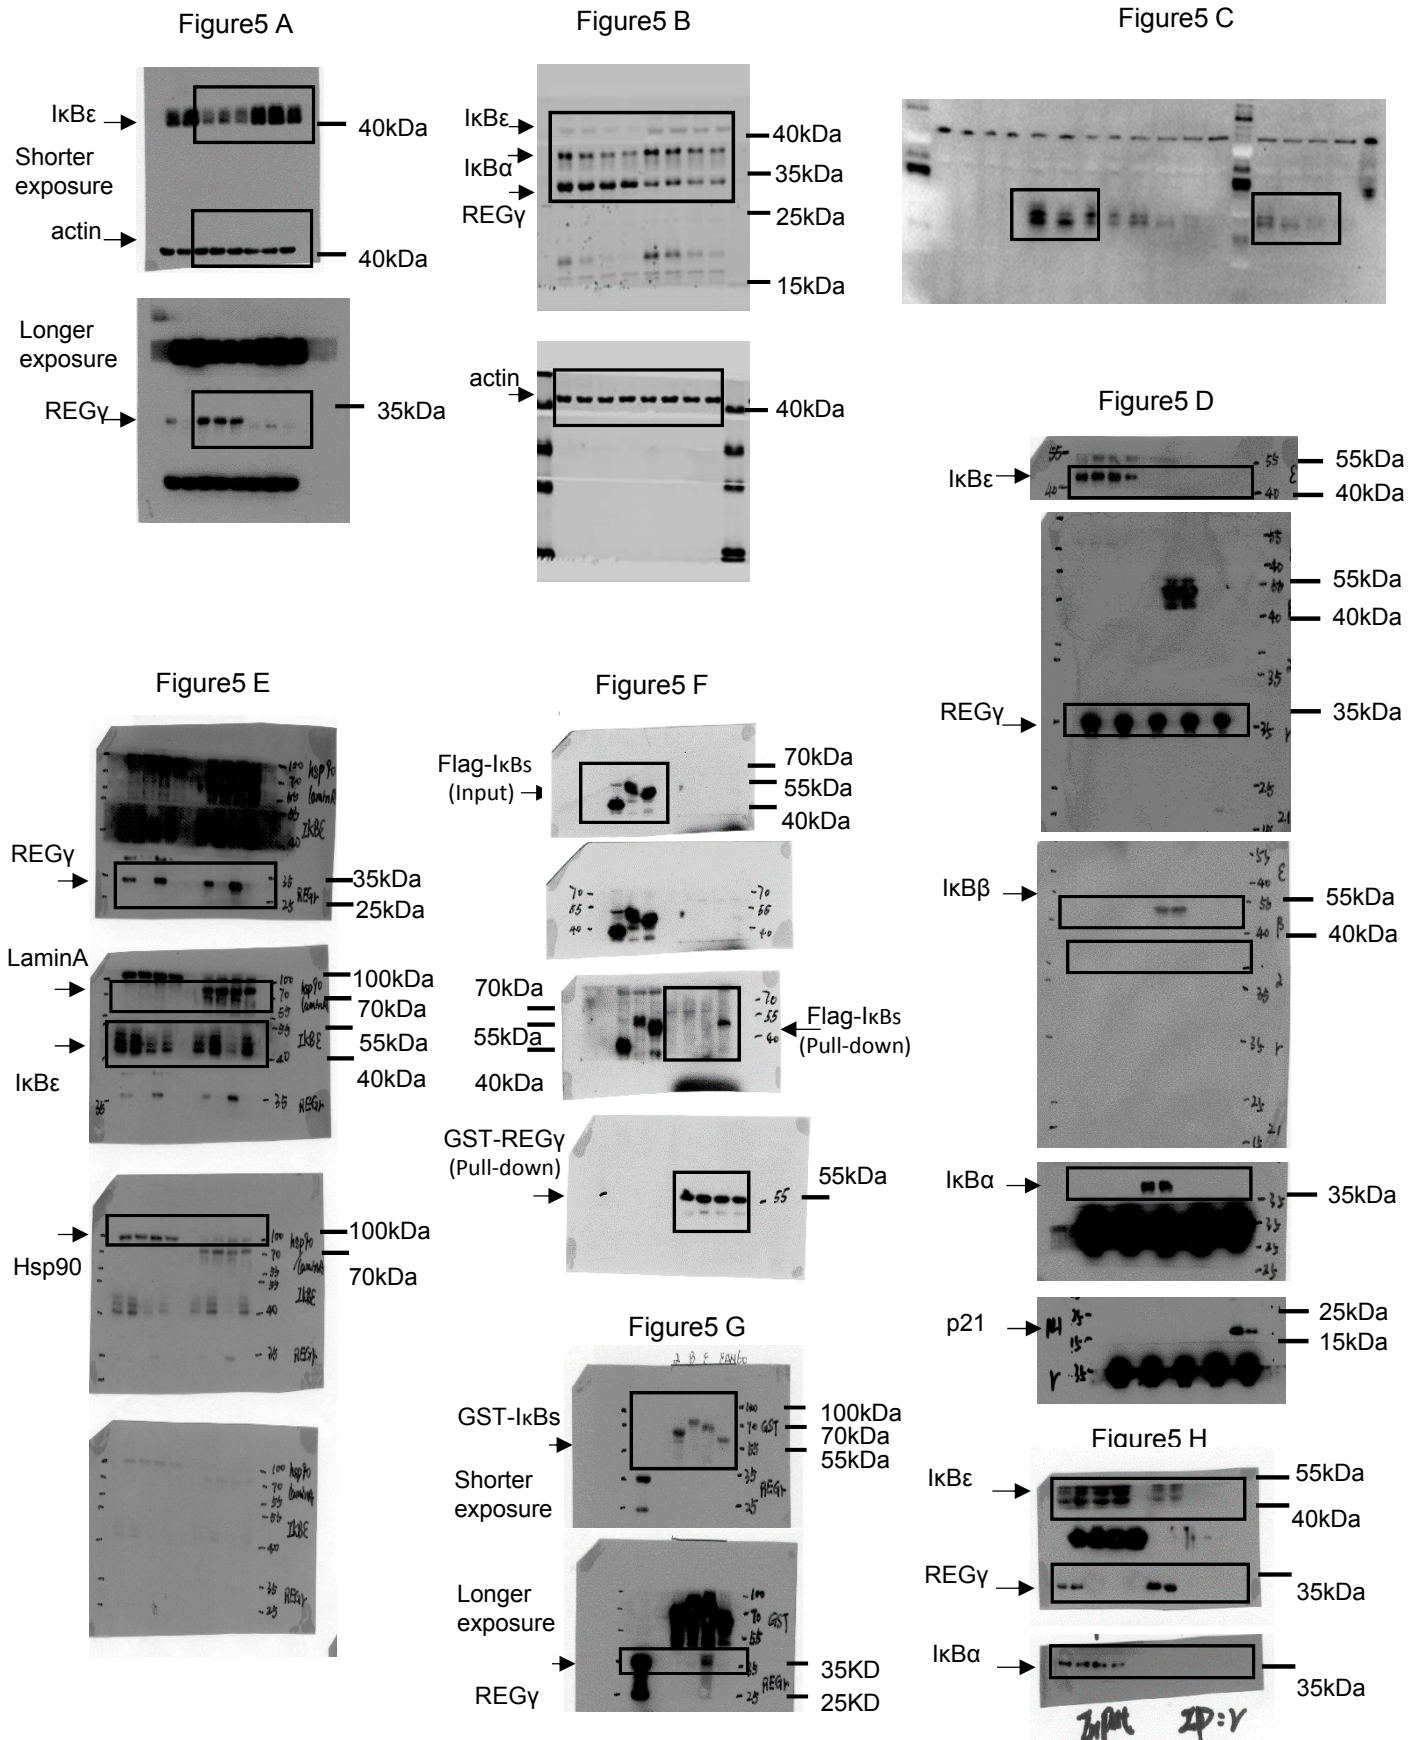

Supplementary Figure 10

Uncropped gel images from Figure 5H and Figure 6

Figure 5 I

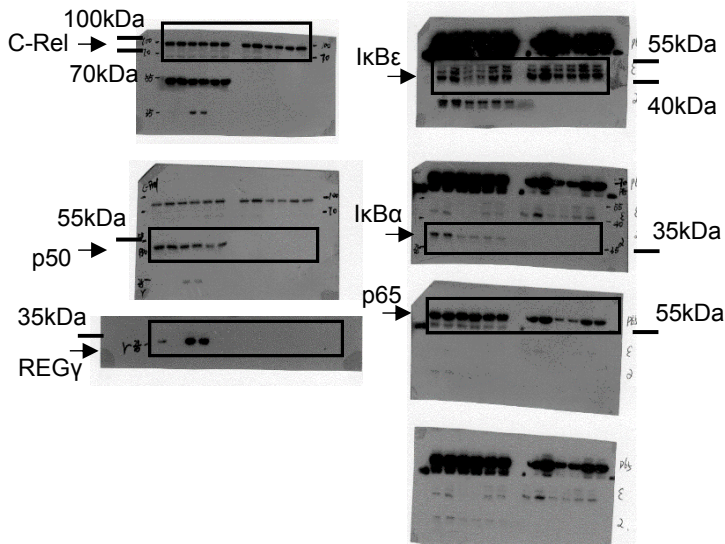

Figure 6 G

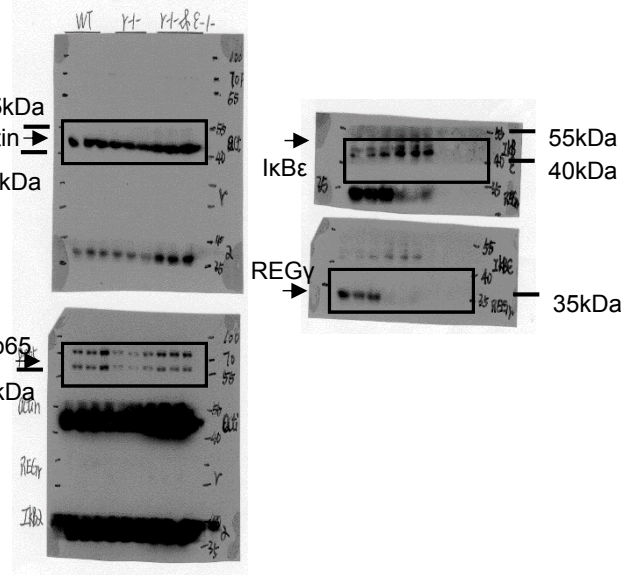

Supplementary Figure 2 B

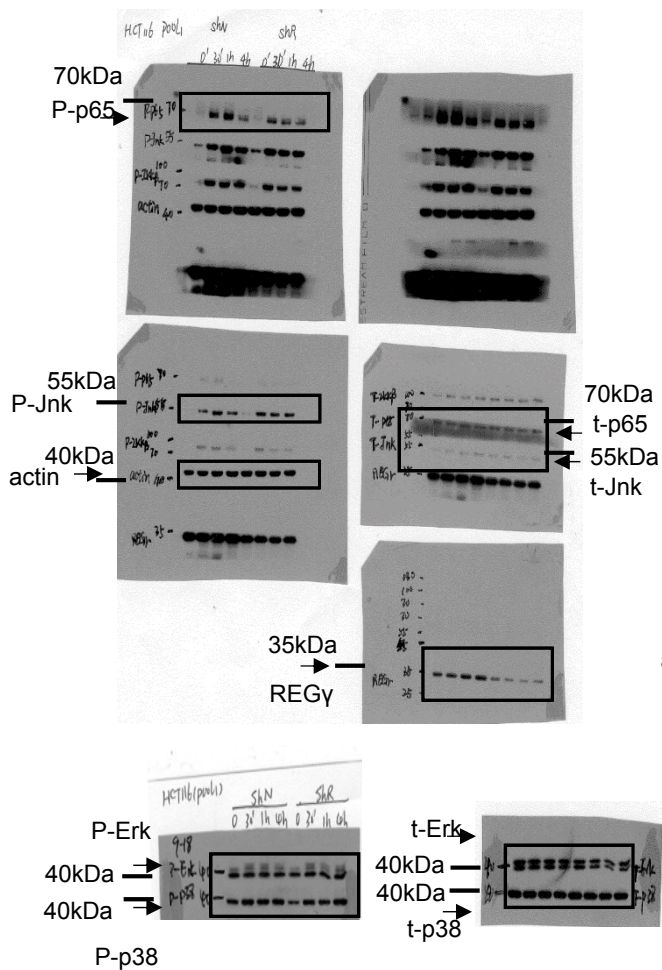

Supplementary Figure 3 B

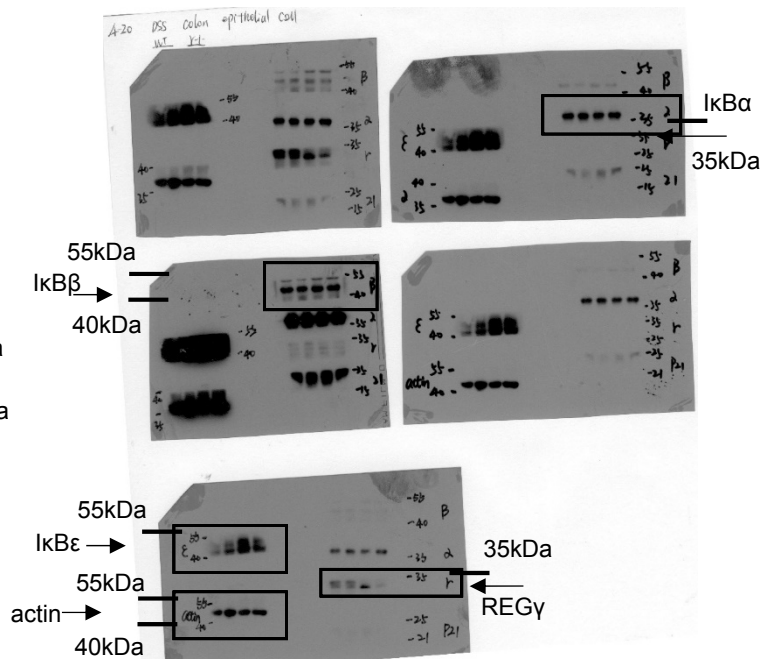

Supplementary Figure 11

Supplementary Figure 3 D

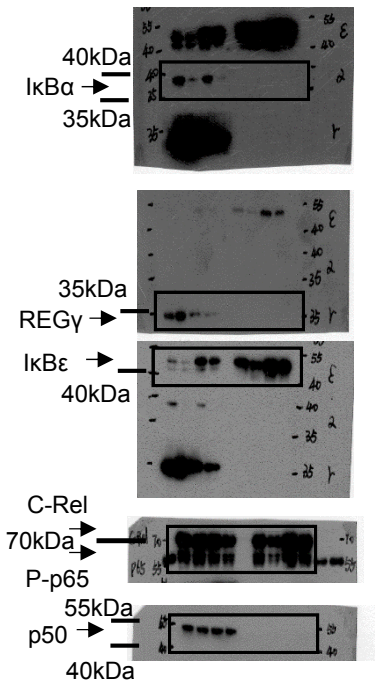

Supplementary Figure 4 B

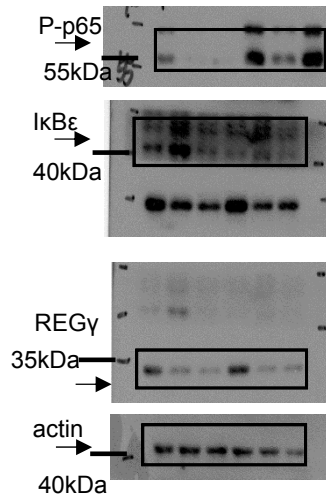

Supplementary Figure 5 A

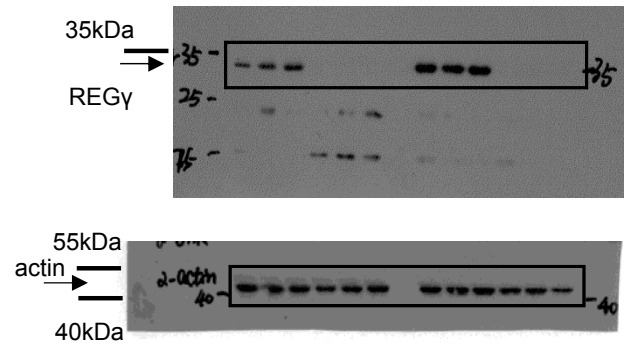

Supplementary Figure 6 A

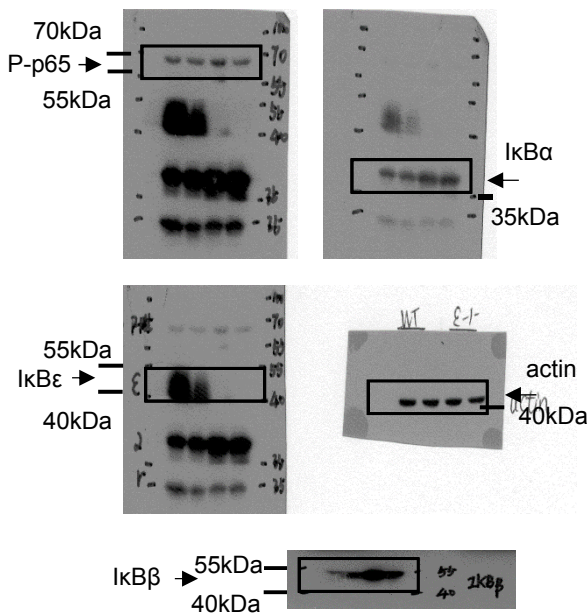

Supplementary Figure 6 B

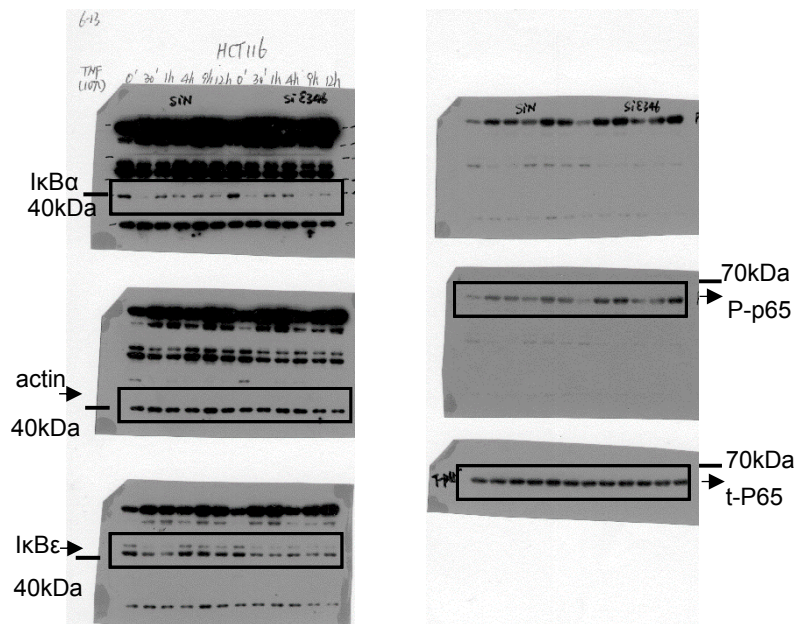

Supplementary Figure 12

Supplementary Figure 7 A

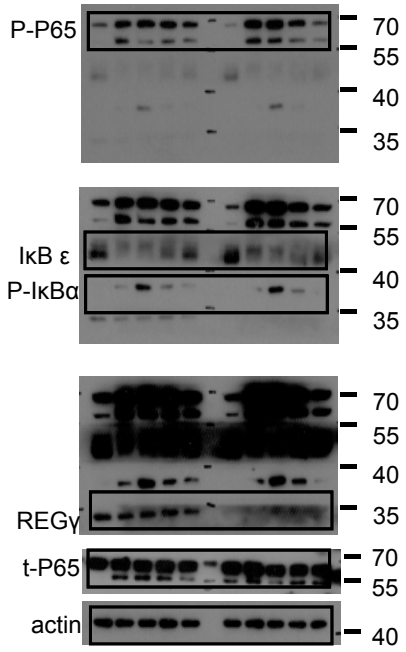

Supplementary Figure 7 C

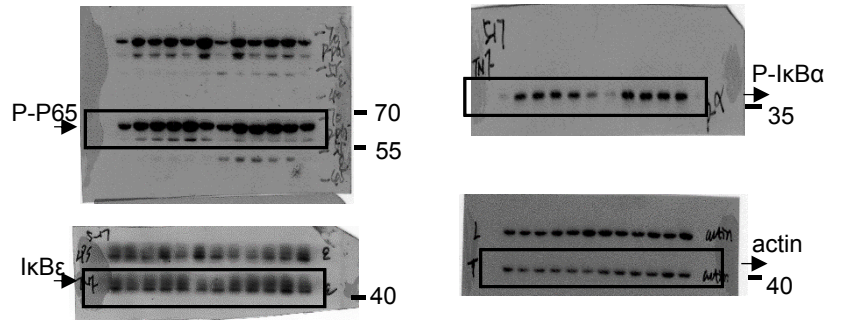

## Supplementary Tables

### Supplementary Table 1

**Proteins differentially regulated in REGy<sup>+/+</sup> and REGy<sup>-/-</sup> MEF cells.** The Full Moon arrays contain antibodies against nearly 1,300 phospho and total proteins, which involves in more than 30 different regulatory pathways.

|                          | <b>REGy<sup>+/+</sup> vs<br/>REGy<sup>-/-</sup></b> |                                | <b>REGy<sup>+/+</sup> vs<br/>REGy<sup>-/-</sup></b> |
|--------------------------|-----------------------------------------------------|--------------------------------|-----------------------------------------------------|
| <b>Name</b>              | <b>Fold change</b>                                  | <b>Name</b>                    | <b>Fold change</b>                                  |
| BCL-2 (Ab-70)            | 10.28896725                                         | PAK1/2/3(PhosphoSer141)        | 1.677577155                                         |
| Rb (Ab-608)              | 7.926245366                                         | GluR1 (Phospho-Ser863)         | 1.668237568                                         |
| CREB (Phospho-Ser142)    | 7.795426163                                         | MYPT1(PhosphoThr853)           | 1.66785366                                          |
| Vinculin (Ab-821)        | 3.581243833                                         | MER/SKY(PhosphoTyr749/Tyr681)  | 1.663813763                                         |
| PKC pan activation site  | 3.186660576                                         | ASK1 (Phospho-Ser966)          | 1.66351219                                          |
| ACC1 (Phospho-Ser80)     | 3.058972685                                         | Pyk2 (Ab-881)                  | 1.657414582                                         |
| c-PLA2 (Phospho-Ser505)  | 3.00150248                                          | ALK (Phospho-Tyr1507)          | 1.651515091                                         |
| Smad3 (Ab-204)           | 2.778798545                                         | CDK7 (Phospho-Thr170)          | 1.651493086                                         |
| ATF-1 (Ab-63)            | 2.774254867                                         | CASP9 (Ab-125)                 | 1.650001352                                         |
| Rb (Phospho-Ser795)      | 2.667937343                                         | c-Jun (Ab-93)                  | 1.640771286                                         |
| PKCdelta(PhosphoSer645)  | 2.635777114                                         | MKP-1/2 (Phospho-Ser296)       | 1.601532637                                         |
| c-Jun (Phospho-Thr91)    | 2.298132554                                         | FER (Phospho-Tyr402)           | 1.594996135                                         |
| HDAC4 (Phospho-Ser632)   | 2.269667543                                         | CD227/mucin1 (Phospho-Tyr1243) | 1.583746785                                         |
| Caspase3(PhosphoSer15)   | 2.123824406                                         | CDC25C (Phospho-Ser216)        | 1.567054694                                         |
| IL3R (Phospho-Tyr593)    | 2.101396707                                         | ACC1 (Phospho-Ser79)           | 1.544646342                                         |
| FER (Phospho-Tyr402)     | 2.093579469                                         | CD32 (FcgammaRIIb) (Ab-292)    | 1.518937175                                         |
| GSK3 alpha (Ab-21)       | 2.082011346                                         | NFkB-p65 (Phospho-Ser536)      | 1.509447457                                         |
| p53 (Phospho-Ser46)      | 2.062507592                                         | SHP-2 (Phospho-Tyr542)         | 1.489058626                                         |
| CASP2 (Ab-157)           | 2.051445315                                         | merlin (Ab-10)                 | 1.483177065                                         |
| Chk1 (Phospho-Ser317)    | 2.038564405                                         | RelB (Phospho-Ser552)          | 1.471011976                                         |
| P70S6K (Phospho-Ser411)  | 2.037074234                                         | HDAC8 (Ab-39)                  | 1.469499176                                         |
| DARPP-32(PhosphoThr34)   | 1.976117209                                         | PPAR-b (Phospho-Thr1457)       | 1.466827453                                         |
| ATPase (Phospho-Ser16)   | 1.97411589                                          | P38 MAPK (Phospho-Tyr182)      | 1.455534652                                         |
| XIAP (Phospho-Ser87)     | 1.973606985                                         | ITGB4 (Phospho-Tyr1510)        | 1.442747299                                         |
| Cateninbeta(PhosphoSer3) | 1.972654212                                         | VEGFR2 (Phospho-Tyr1214)       | 1.438017595                                         |
| AKT1 (Ab-308)            | 1.96803916                                          | PAK1 (Phospho-Ser204)          | 1.433107907                                         |
| MAP3K7/TAK1 (Ab-439)     | 1.958481953                                         | Caspase 9 (Ab-196)             | 1.41905323                                          |
| HSP 90-beta (Ab-226)     | 1.810567145                                         | Connexin 43 (Ab-367)           | 1.419050468                                         |
| HSP27 (Phospho-Ser78)    | 1.798735075                                         | NFkB-p65 (Phospho-Ser311)      | 1.408624928                                         |
| WASP (Ab-290)            | 1.732364028                                         | Cyclin E1 (Ab-77)              | 1.402830933                                         |
| Dok-1 (Phospho-Tyr362)   | 1.706018808                                         | p53 (Phospho-Ser392)           | 1.402106832                                         |
| MKP-1/2(Phospho-Ser296)  | 1.697008766                                         | NFkB-p65 (Phospho-Ser276)      | 1.400258618                                         |

|                                     | REGy <sup>+/+</sup><br>REGy <sup>-/-</sup> | vs |                                     | REGy <sup>+/+</sup><br>REGy <sup>-/-</sup> | vs |
|-------------------------------------|--------------------------------------------|----|-------------------------------------|--------------------------------------------|----|
| Name                                | Fold change                                |    | Name                                | Fold change                                |    |
| CoagulationFactorIII(PhosphoSer290) | 0.708761709                                |    | Stathmin 1(Phospho-Ser37)           | 0.585807389                                |    |
| Rb (Ab-608)                         | 0.706057827                                |    | Mst1/Mst2 (Phospho-Thr183)          | 0.573902117                                |    |
| CD4 (Ab-433)                        | 0.705454713                                |    | EGFR (Phospho-Thr678)               | 0.56397586                                 |    |
| FADD (Phospho-Ser194)               | 0.703367687                                |    | c-Jun (Ab-239)                      | 0.550986973                                |    |
| NFkB-p100 (Phospho-Ser872)          | 0.702728445                                |    | BCL-2 (Phospho-Thr56)               | 0.535331342                                |    |
| PAK1/2/3 (Phospho-Ser141)           | 0.702558538                                |    | PAK2 (Ab-192)                       | 0.525479604                                |    |
| Cyclin D3 (Phospho-Thr283)          | 0.699571557                                |    | Hsp90cochaperoneCdc37(PhosphoSer13) | 0.520333639                                |    |
| AKT1 (Phospho-Thr72)                | 0.699309765                                |    | MSK1 (Phospho-Thr581)               | 0.518629456                                |    |
| COT (Ab-290)                        | 0.696072196                                |    | AKT (Phospho-Thr308)                | 0.516535705                                |    |
| Tuberin/TSC2 (Ab-939)               | 0.695390025                                |    | CDC25A (Ab-75)                      | 0.508631016                                |    |
| FADD (Phospho-Ser194)               | 0.693457483                                |    | RSK1/2/3/4 (Ab-221/227/218/232)     | 0.492045351                                |    |
| MEF2A (Ab-312)                      | 0.676469453                                |    | CDK2 (Phospho-Thr160)               | 0.491958748                                |    |
| claudin 3 (Phospho-Tyr219)          | 0.675715492                                |    | Synuclein alpha (Ab-133)            | 0.486865466                                |    |
| P70S6K (Ab-229)                     | 0.666299578                                |    | KIT (Phospho-Tyr703)                | 0.484971849                                |    |
| JunB (Phospho-Ser79)                | 0.66374614                                 |    | Shc (Phospho-Tyr349)                | 0.472671761                                |    |
| RelB (Ab-552)                       | 0.662495301                                |    | ATPase (Ab-16)                      | 0.444124652                                |    |
| p21Cip1 (Phospho-Thr145)            | 0.660524367                                |    | KIT (Phospho-Tyr703)                | 0.440843615                                |    |
| G3BP-1 (Ab-232)                     | 0.660333688                                |    | MAPKAPK2 (Phospho-Thr334)           | 0.440795175                                |    |
| MEF2D (Phospho-Ser444)              | 0.659388153                                |    | Abl1 (Ab-754/735)                   | 0.429181608                                |    |
| ATP1A1/Na+K+ ATPase 1 (Ab-23)       | 0.658697445                                |    | EGFR (Phospho-Thr693)               | 0.395265589                                |    |
| Pim-1 (Ab-309)                      | 0.658260504                                |    | AMPK1 (Ab-174)                      | 0.387067112                                |    |
| MARCKS (Phospho-Ser158)             | 0.656677121                                |    | Pyk2 (Phospho-Tyr579)               | 0.382395096                                |    |
| Raf1 (Phospho-Ser338)               | 0.656422498                                |    | Chk2 (Phospho-Thr68)                | 0.382244761                                |    |
| eEF2K (Ab-366)                      | 0.654316892                                |    | Tau (Ab-205)                        | 0.367804061                                |    |
| NFkB-p105/p50 (Ab-932)              | 0.638685407                                |    | Trk A (Phospho-Tyr701)              | 0.354871313                                |    |
| ATP-Citrate Lyase (Ab-454)          | 0.638592776                                |    | Abl1 (Ab-204)                       | 0.354572601                                |    |
| VASP (Ab-157)                       | 0.63813815                                 |    | p53 (Ab-376)                        | 0.35227797                                 |    |
| ERK3 (Phospho-Ser189)               | 0.632898703                                |    | CASP8 (Ab-347)                      | 0.348369613                                |    |
| BAD (Ab-112)                        | 0.632325906                                |    | Tau (Ab-205)                        | 0.347269551                                |    |
| Catenin beta (Phospho-Tyr654)       | 0.630975201                                |    | PKD1/PKC mu (Phospho-Ser205)        | 0.33217498                                 |    |
| 4E-BP1 (Phospho-Thr45)              | 0.630579786                                |    | c-Jun (Phospho-Ser63)               | 0.319666351                                |    |
| CDK1/CDC2 (Ab-14)                   | 0.628359686                                |    | Rac1/cdc42 (Phospho-Ser71)          | 0.302642388                                |    |
| MEF2D (Phospho-Ser444)              | 0.627745938                                |    | IkBε                                | 0.27377487                                 |    |
| 4E-BP1 (Ab-65)                      | 0.617150926                                |    | Androgen Receptor (Ab-650)          | 0.166621646                                |    |
| NFkB-p65 (Ab-281)                   | 0.61696929                                 |    | Trk A (Ab-496)                      | 0.086558242                                |    |
| PLC-beta (Phospho-Ser1105)          | 0.609756074                                |    |                                     |                                            |    |



Supplementary table2

IκBs N-terminal sequence alignment

|           |                                                              |
|-----------|--------------------------------------------------------------|
| IκBbeta   | -----MAGVACL-----G                                           |
| IκBalpha  | MFQAA-----ERPQEWAMEGPRDGLKK-----                             |
| IκBepsino | MSEARKGPDEAEESQYDSGIESLRSLRSLPESTSAPASGPSDGSPPQCTHPPGPVKEPQE |

**Supplementary Table 3****Sequences of primers used for Q-PCR**

| Gene                | Forward (5'→3')         | Reverse (5'→3')          |
|---------------------|-------------------------|--------------------------|
| IL-8(homo)          | GCATAAAGACATACTCCAAACC  | AAAACCTTCTCCACAACCCTC    |
| IL-6(homo)          | AATTCGGTACATCCTCGACGG   | TTGGAAGGTTTCAGGTTGTTTTCT |
| IL-1 $\beta$ (homo) | AGCTACGAATCTCCGACCAC    | CGTTATCCCATGTGTGCGAAGAA  |
| CXCL5(homo)         | AGCTGCGTTGCGTTTGTTTAC   | TGGCGAACACTTGCAGATTAC    |
| TNF $\alpha$ (homo) | CCTCTCTCTAATCAGCCCTCTG  | GAGGACCTGGGAGTAGATGAG    |
| KC(mus)             | ACTGCACCCAAACCGAAGTC    | TGGGGACACCTTTTAGCATCTT   |
| MIP2 $\alpha$ (mus) | ATCCAGAGCTTGAGTGTGACGC  | AAGGCCAACTTTTTGACCGCC    |
| MIP2 $\beta$ (mus)  | CATAGCCACT CTCAAGGATG   | AGAATGCAGGTCCTTCATCATG   |
| CXCL5(mus)          | GTTCCATCTCGCCATTCATGC   | GCGGCTATGACTGAGGAAGG     |
| IL-1 $\beta$ (mus)  | GAAATGCCACCTTTTGACAGTG  | TGGATGCTCTCATCAGGACAG    |
| IL-6(mus )          | CTGCAAGAGACTTCCATCCAG   | AGTGGTATAGACAGGTCTGTTGG  |
| TNF $\alpha$ (mus ) | CCTGTAGCCACGTCGTAG      | GGGAGTAGACAAGGTACAACCC   |
| CyclinD1(mus)       | GCGTACCCTGACACCAATCTC   | CTCCTCTTCGCACTTCTGCTC    |
| Cox2(mus)           | CACCCTGACATAGACAGTGAAAG | CTGGGTCACGTTGGATGAGG     |
| Survivin(mus)       | TGGCAGCTGTACCTCAAGAA    | AGCTGCTCAATTGACTGACG     |
